# Supplementary material for: Bio-derived dimethyl itaconate: a sustainable, low-cost electrolyte additive for high-performance lithium batteries
Source: Royal Society of Chemistry journal article supplement (doi:10.1039/d5gc01367d), 2025-01-01
Supplement: d5gc01367d1.pdf [file d5gc01367d1.pdf]

## Supporting Information

### **Bio-Derived Dimethyl Itaconate: A Sustainable, Low-Cost Electrolyte Additive for High-Performance Lithium Batteries**

Chengliang Wang<sup>[a]</sup>, Mingming Zhou<sup>[a]</sup>, Lintong Zhou<sup>[a]</sup>, Le Chang<sup>[a]</sup>, Jianjiang He<sup>[a]</sup>,  
Wei Zhao<sup>[a]</sup>, Jingjiang Sun<sup>\*[a]</sup> and Qingfu Wang<sup>\*[a]</sup>

<sup>[a]</sup>Key Laboratory of Rubber-plastics, Ministry of Education, School of Polymer Science and  
Engineering, Qingdao University of Science and Technology

\*Corresponding Authors: Jingjiang Sun: [sunjij@qust.edu.cn](mailto:sunjij@qust.edu.cn), Qingfu Wang: [wangqf@qust.edu.cn](mailto:wangqf@qust.edu.cn)

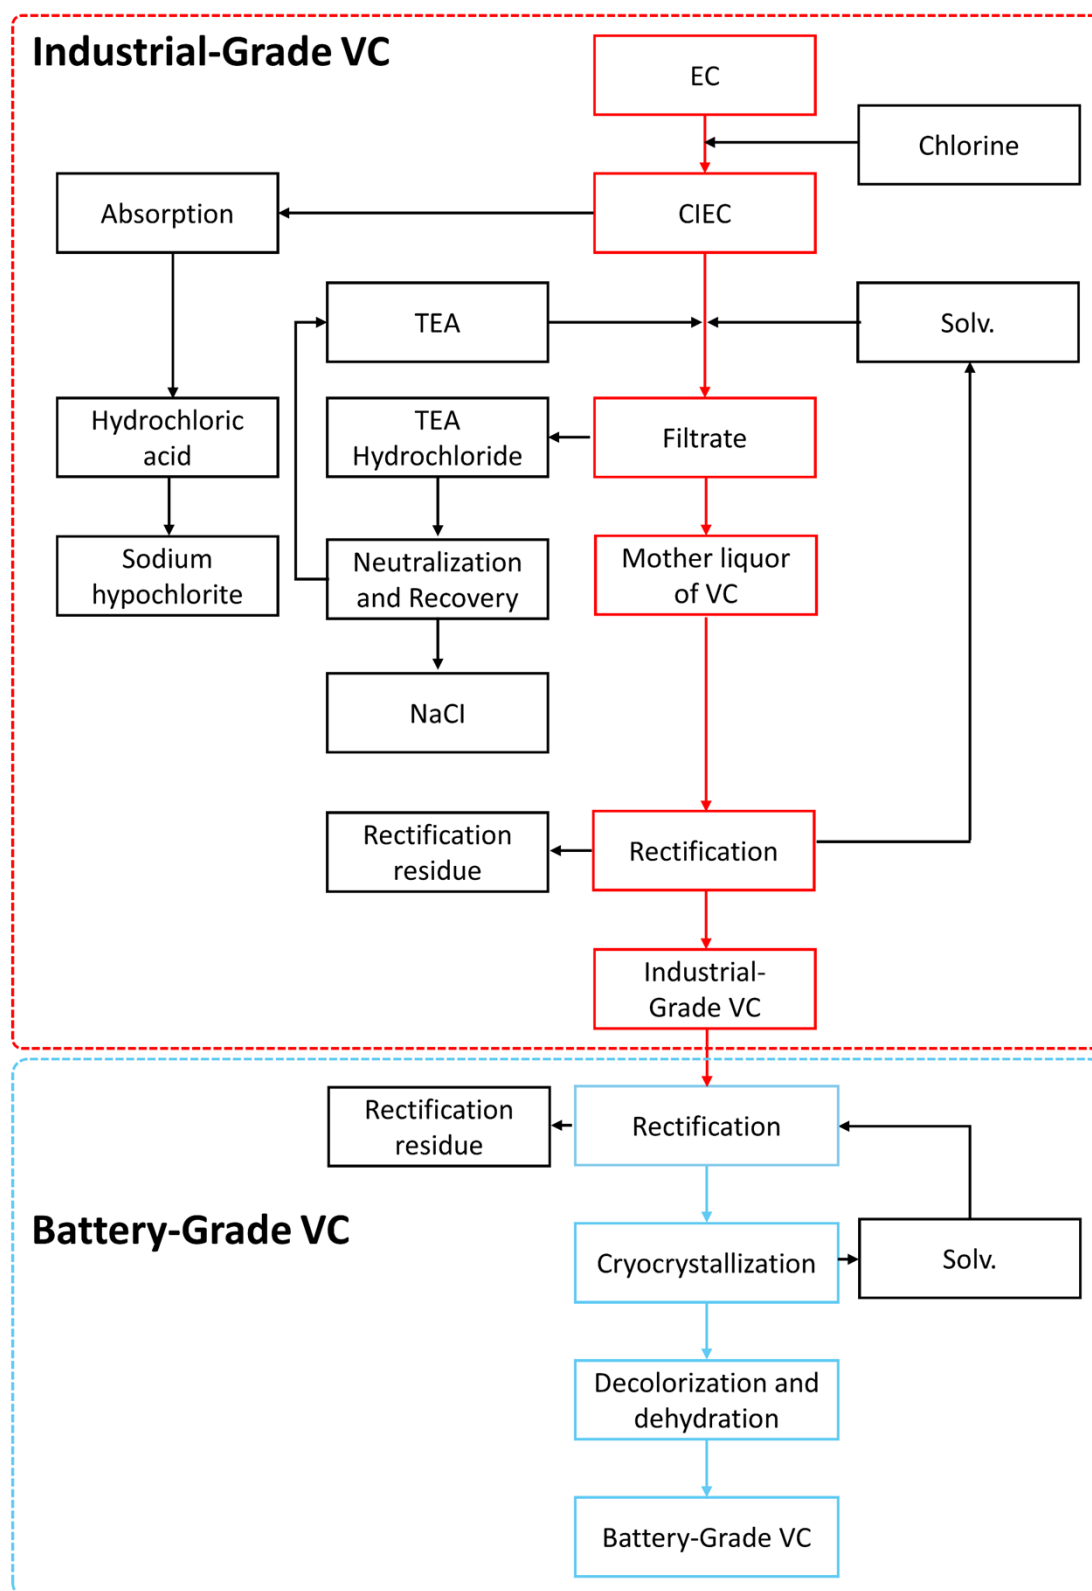

**Figure S1** The production and purification of Battery-Grade VC.

**Table S1** The comprehensive comparison between DMIC and VC (Safety Data Sheet from sigma-aldrich).

|                                   | VC                                                                                                                                                                                                                                                                                                                                                                                                                                                                                                                   | DMIC                                                                                                                                                                                                   |
|-----------------------------------|----------------------------------------------------------------------------------------------------------------------------------------------------------------------------------------------------------------------------------------------------------------------------------------------------------------------------------------------------------------------------------------------------------------------------------------------------------------------------------------------------------------------|--------------------------------------------------------------------------------------------------------------------------------------------------------------------------------------------------------|
| <b>Raw materials and sources</b>  | Petroleum-based, synthetic                                                                                                                                                                                                                                                                                                                                                                                                                                                                                           | Biomass-based (from itaconic acid via fermentation)                                                                                                                                                    |
| <b>Production process</b>         | Multi-step, involves toxic reagents                                                                                                                                                                                                                                                                                                                                                                                                                                                                                  | Single-step esterification with methanol                                                                                                                                                               |
| <b>Flash point</b>                | 80 °C                                                                                                                                                                                                                                                                                                                                                                                                                                                                                                                | 100 °C                                                                                                                                                                                                 |
| <b>Hazard Statements</b>          |  <p>H227 Combustible liquid.<br/> H302 Harmful if swallowed.<br/> H311 Toxic in contact with skin.<br/> H315 Causes skin irritation.<br/> H317 May cause an allergic skin reaction.<br/> H318 Causes serious eye damage.<br/> H373 May cause damage to organs (Liver, Stomach) through prolonged or repeated exposure if swallowed.<br/> H401 Toxic to aquatic life.<br/> H411 Toxic to aquatic life with long lasting effects.</p> |  <p>H315 Causes skin irritation.<br/> H317 May cause an allergic skin reaction.<br/> H401 Toxic to aquatic life.</p> |
| <b>LD<sub>50</sub></b>            | Oral-Rat-male and female >300 - <500 mg/kg                                                                                                                                                                                                                                                                                                                                                                                                                                                                           | Oral-Rat-female >2,000 mg/kg                                                                                                                                                                           |
| <b>Biodegradability</b>           | aerobic - Exposure time 28 d<br>Result: 22 % - Not rapidly biodegradable                                                                                                                                                                                                                                                                                                                                                                                                                                             | aerobic - Exposure time 21 d<br>Result: 95 % - Readily biodegradable                                                                                                                                   |
| <b>Industrial Production Cost</b> | Higher (due to safety, regulation, raw materials)                                                                                                                                                                                                                                                                                                                                                                                                                                                                    | Lower (simple route, renewable feedstock)                                                                                                                                                              |

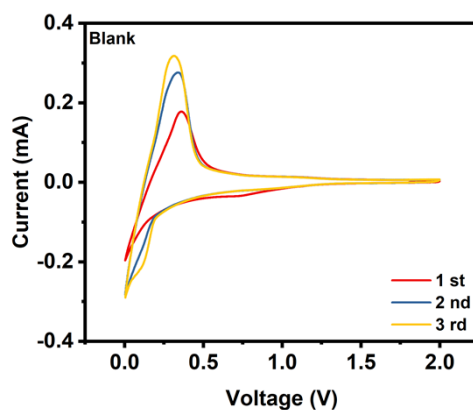

**Figure S2** CV curves of the graphite/Li cells with the Blank electrolyte at a scan rate of 0.1 mV/s.

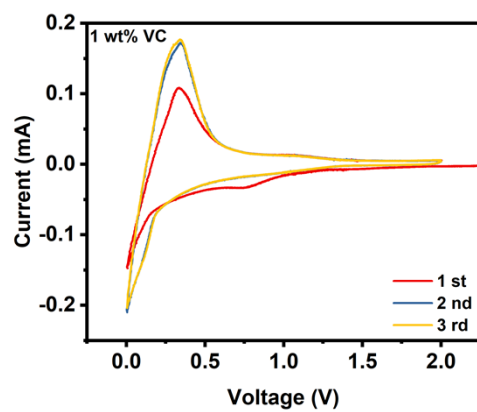

**Figure S3** CV curves of the graphite/Li cells with the 1wt% VC adding electrolyte at a scan rate of 0.1 mV/s.

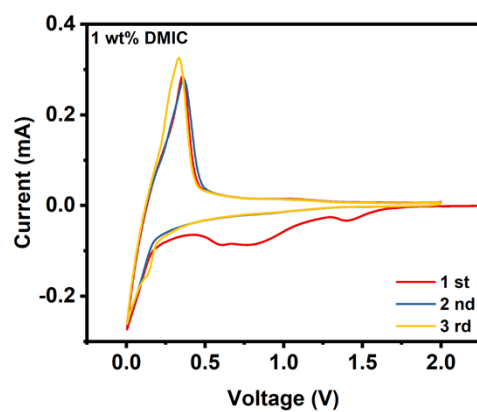

**Figure S4** CV curves of the graphite/Li cells with the 1wt% DMIC adding electrolyte at a scan rate of 0.1 mV/s.

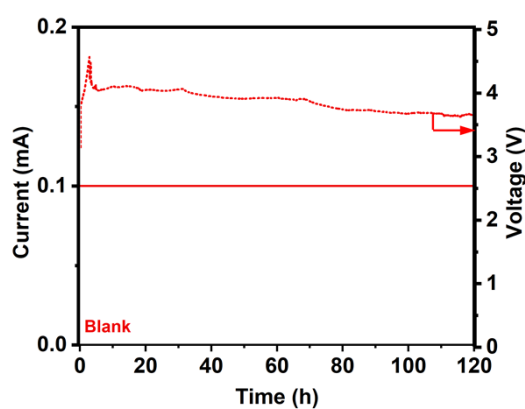

**Figure S5** Leakage current of the NCM622/Li cells of Blank electrolyte.

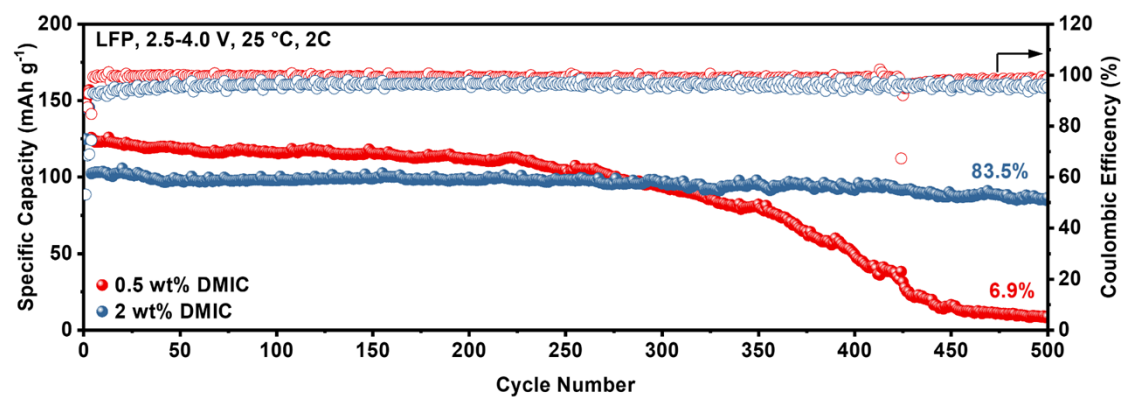

**Figure S6** Long-term cycling performance at 2C of LFP/Li cells.

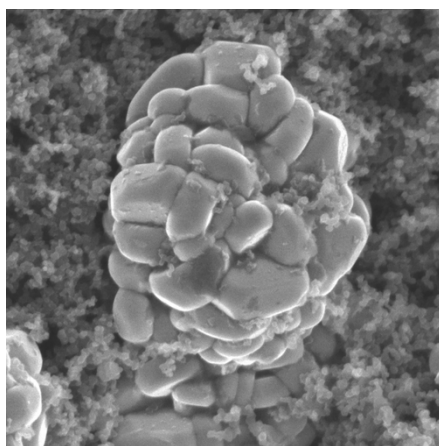

**Figure S7** SEM image of NCM622 particles in the original state.
